# Supplementary material for: The molecular mechanism of three novel peptides from C-phycocyanin alleviates MPTP-induced Parkinson's disease-like pathology in zebrafish
Source: Royal Society of Chemistry journal article supplement (doi:10.1039/d3fo01098h), 2023-01-01
Supplement: d3fo01098h1.pdf [file d3fo01098h1.pdf]

# The molecular mechanism of three novel peptides from C-phycocyanin alleviate MPTP-induced Parkinson's disease-like pathology in zebrafish

Feng-hua Xu<sup>a,†</sup>, Yue-zi Qiu<sup>b,†</sup>, Yun Zhang<sup>b</sup>, Fang-hao Yang<sup>a</sup>, Min-min Ji<sup>c</sup>, Ke-chun Liu<sup>b</sup>, Meng Jin<sup>b</sup>, Shan-shan Zhang<sup>b,\*</sup> and Bing Li<sup>a,\*</sup>

<sup>a</sup> Department of Genetics and Cell Biology, Basic Medical College, Qingdao University, Qingdao, 266000, China

<sup>b</sup> Biology Institute, Qilu University of Technology (Shandong Academy of Sciences), Jinan, 250103, China

<sup>c</sup> Department of Stomatology, Shandong Second Provincial General Hospital, Jinan, 250103, China

## \*Corresponding authors

Shanshan Zhang, Biology Institute, Qilu University of Technology (Shandong Academy of Sciences), Jinan, 250103, China

Email: [qingshuibaikai@126.com](mailto:qingshuibaikai@126.com)

Bing Li, Department of Genetics and Cell Biology, Basic Medical College, Qingdao University, Qingdao, 266000, China

Email: [libing\\_516@qdu.edu.cn](mailto:libing_516@qdu.edu.cn)

<sup>†</sup>These authors contributed equally to this work

## Supplementary Information

Supplementary Table 1.

| The gene primers for quantitative real-time PCR |         |                         |                     |
|-------------------------------------------------|---------|-------------------------|---------------------|
| Primer                                          |         | Sequence                | Length (nucleotide) |
| <i>rps18</i>                                    | Forward | ATACAGCCAGGTCCTTGCTAATG | 23                  |
|                                                 | Reverse | GTGACGGAGACCACGGTGAG    | 20                  |
| <i>keap1</i>                                    | Forward | ATACCAACCAGACACCAACAC   | 21                  |
|                                                 | Reverse | GGTTTGTCCATCATAGCCTCC   | 21                  |
| <i>nrf2</i>                                     | Forward | ATGTCTAAAATGCAGCCAAGCC  | 22                  |

|                                |         |                          |    |
|--------------------------------|---------|--------------------------|----|
|                                | Reverse | CGGTAGCTGAAGTCGAACAC     | 20 |
| <i>gclc</i>                    | Forward | CGGATGGAGAGTGGAGTTCA     | 20 |
|                                | Reverse | TTCGCTTCTGGGCTACCTT      | 19 |
| <i>gclm</i>                    | Forward | ATCCATCAGAAGTGCGGTAG     | 20 |
|                                | Reverse | TGCAGGTGTGTCAGTGTCT      | 19 |
| <i>ho-1</i>                    | Forward | AAGCAAAGCGGCAGAGAAC      | 19 |
|                                | Reverse | TGGAGCAGTCAGATGAAGTGT    | 21 |
| <i>nqo1</i>                    | Forward | CTGGGTGGTGTGTTTGAAGAA    | 21 |
|                                | Reverse | GCTGTGGTAATGCCGTAGG      | 19 |
| <i><math>\alpha</math>-syn</i> | Forward | ATGGATGTTTTATGAAGGGGC    | 22 |
|                                | Reverse | ACGCTGTCTTTGGTCTTGCT     | 20 |
| <i>parkin</i>                  | Forward | GGCAATGAAGATGATGTGGAAC   | 22 |
|                                | Reverse | ATCACGTTGGGATGAGCACT     | 20 |
| <i>beclin1</i>                 | Forward | AGAGCATTGAGACAAAGCGTGAA  | 23 |
|                                | Reverse | TCTGCCAAGGCGGAAGTTATT    | 21 |
| <i>atg5</i>                    | Forward | AGGGGATAACAGCACAAACG     | 20 |
|                                | Reverse | CTTCTTATGCAGCGTGCCA      | 20 |
| <i>map1lc3b</i>                | Forward | AAAGGAGGACATTTGAGCAG     | 20 |
|                                | Reverse | AATGTCTCCTGGGAAGCGTA     | 20 |
| <i>atg3</i>                    | Forward | GGCTGTTTGGATATGATGAG     | 20 |
|                                | Reverse | AGCAGGTGGAGGGAGATTAG     | 20 |
| <i>caspase-1</i>               | Forward | TCAGCAAAGGAAATGGAT       | 18 |
|                                | Reverse | TTAGACGGCGGTAGACAT       | 18 |
| <i>caspase-3</i>               | Forward | TCAGTCACGGCGATGAGGG      | 19 |
|                                | Reverse | CCTCGACAAGCCTGAATAAAGAAC | 24 |
| <i>caspase-8</i>               | Forward | AAGACCTGATTCTGCGACTG     | 20 |
|                                | Reverse | TAGGCTGAGACACCTTTACG     | 20 |
| <i>caspase-9</i>               | Forward | GAGACCAACCAGGCCAAGAC     | 20 |
|                                | Reverse | TCTCGTGCCTTATGCGTTTAGAT  | 23 |
| <i>bax</i>                     | Forward | GGCTATTTCAACCAGGGTTCC    | 21 |
|                                | Reverse | TGCGAATCACCAATGCTGT      | 19 |

|              |         |                       |    |
|--------------|---------|-----------------------|----|
| <i>bcl-2</i> | Forward | TCACTCAGTTCAGACCCTCAT | 21 |
|              | Reverse | ACGCTTTCCACGCACAT     | 17 |

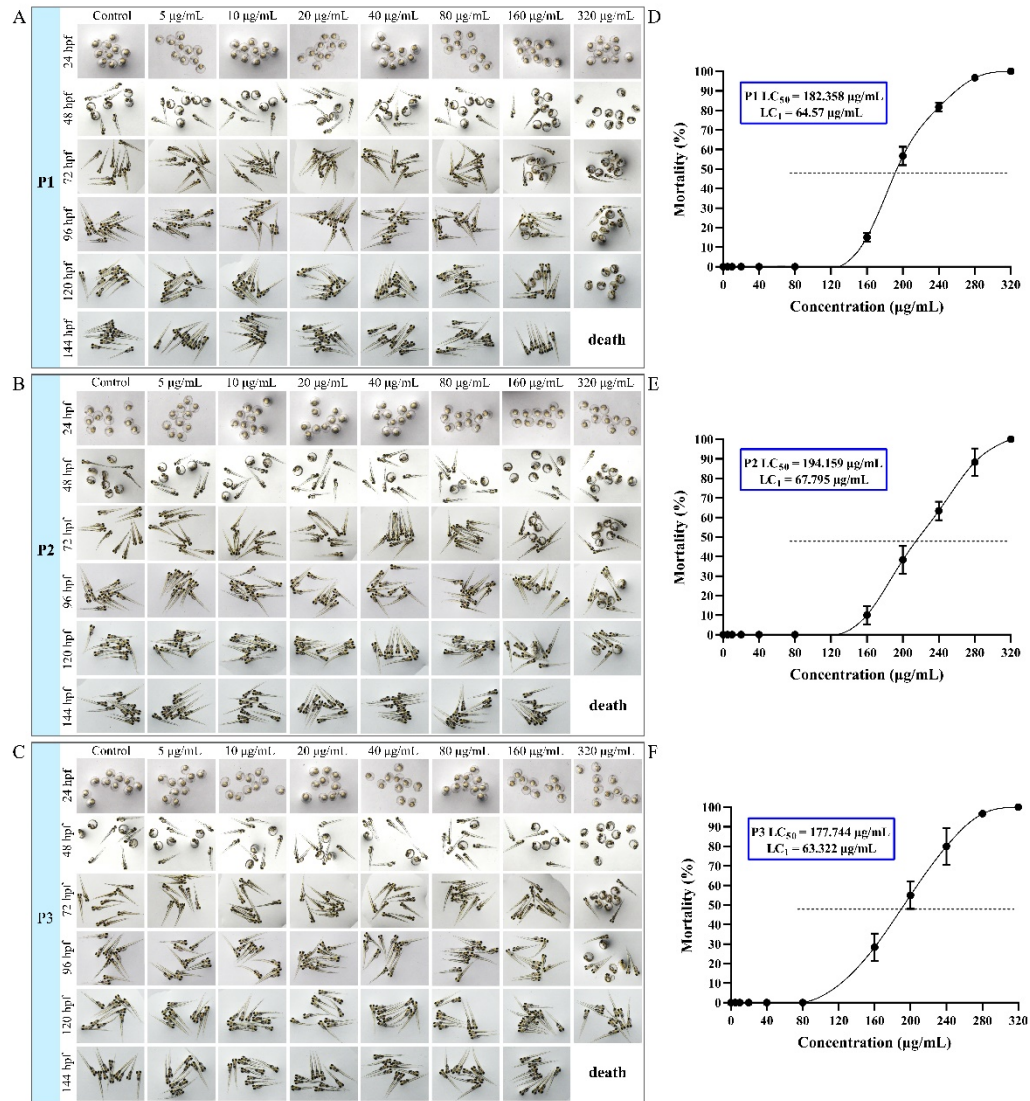

**Supplementary Fig. 1. The effects of three peptides on the morphology and mortality of zebrafish embryonic/larval.** (A)-(C) The overall developmental morphology of zebrafish at 24–144 hpf. (D)-(F) The mortality of zebrafish larvae at 144 hpf.

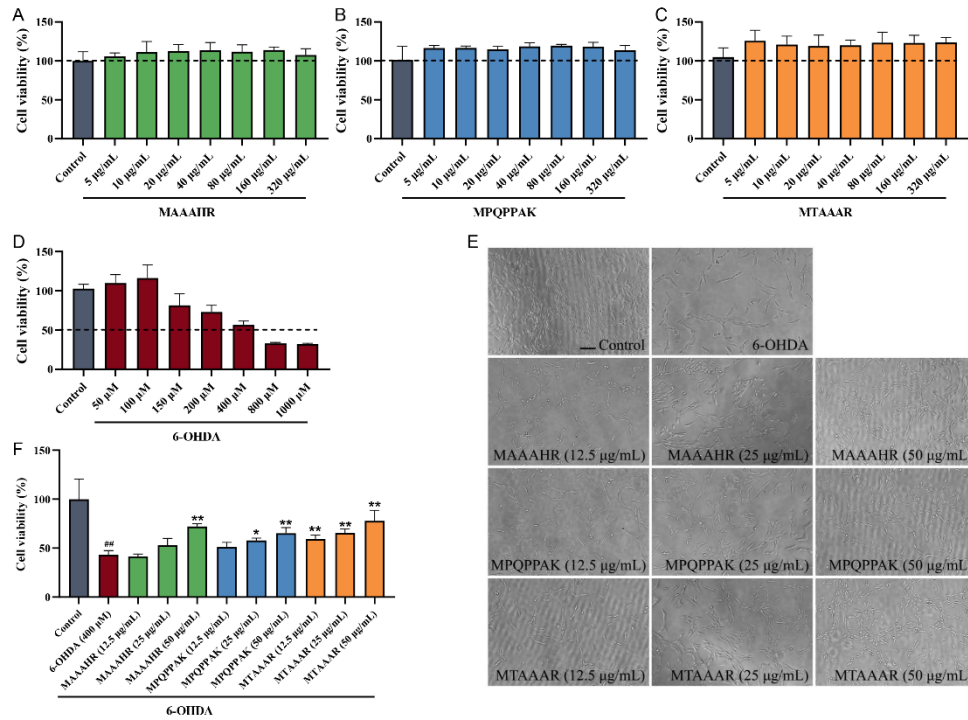

**Supplementary Fig. 2. Effects of three novel peptides on 6-OHDA-induced PC12 cell death.**

(A) Cells were treated for 6 h with or without different concentrations of MAAHR. (B) Cells were treated for 6 h with or without different concentrations of MPQPPAK. (C) Cells were treated for 6 h with or without different concentrations of MTAAAR. (D) PC12 cells were incubated for 12 h with different concentrations of 6-OHDA. (E) Morphological changes in PC12 cells were visualized under an inverted microscope. (F) Cells were pretreated for 6 h with or without different concentrations of C-PC peptides. All groups were exposed to 400 μM 6-OHDA for another 12 h after the pretreatment. In A-F, cell viability was measured by the CCK8 assay and the results are expressed as a percentage of that of the control group (without treatment with 6-OHDA). <sup>##</sup> $p < 0.01$  vs. Control; <sup>\*</sup> $p < 0.05$ , <sup>\*\*</sup> $p < 0.01$  vs. 6-OHDA group.

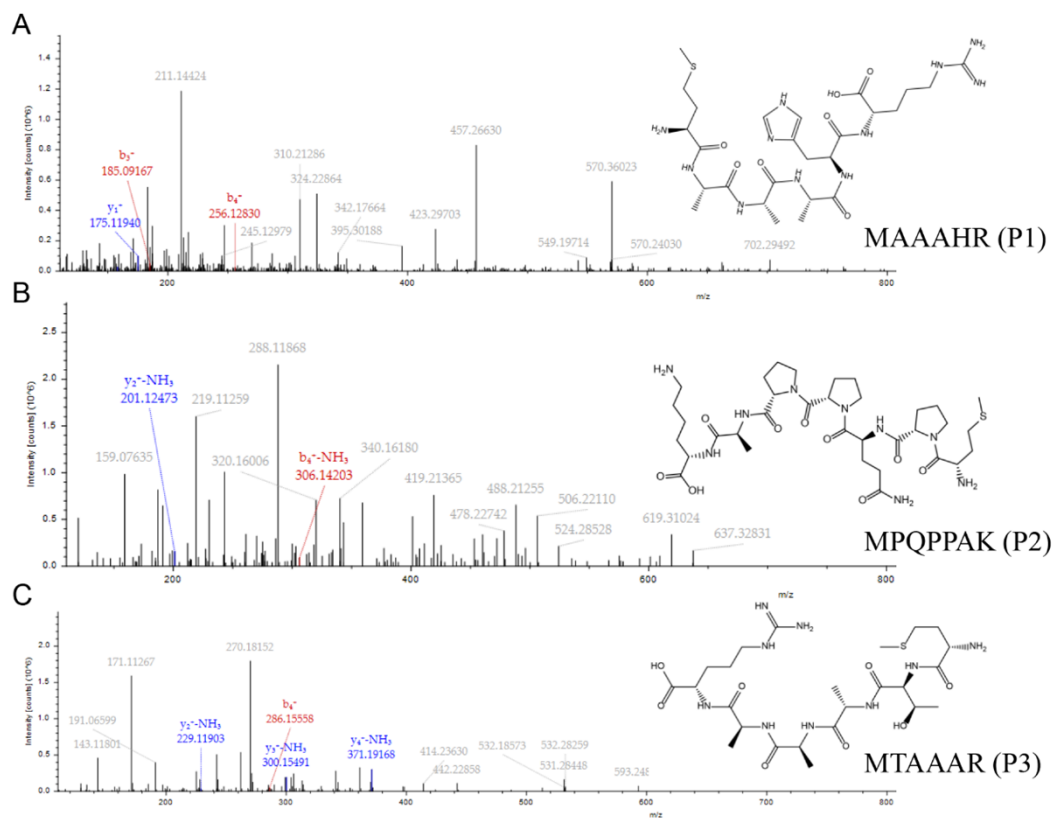

**Supplementary Fig. 3. MS/MS spectra and structures of the three peptides from C-Phycocyanin (C-PC). (A) MAAAHR (P1). (B) MPQPPAK (P2). (C) MTAAAR (P3).**
